# Supplementary material for: Cubane-forming cyclic dienes that exhibit orthogonal reactivities in the solid state
Source: Royal Society of Chemistry journal article supplement (doi:10.1039/d1cc02725e), 2021-01-01
Supplement: d1cc02725e1.pdf [file d1cc02725e1.pdf]

## Supplementary Materials

### **Cubane-forming cyclic dienes that exhibit orthogonal reactivities in the solid state**

Changan Li,<sup>a</sup> Michael A. Sinnwell,<sup>a</sup> Dale C. Swenson<sup>a</sup> and Leonard R. MacGillivray<sup>\*a</sup>

<sup>a</sup>*Department of Chemistry, University of Iowa, Iowa City, IA 52242, USA*

*e-mail: len-macgillivray@uiowa.edu*

#### **Supplementary Information:**

- S1) Experimental section
- S2) Single crystal X-ray diffraction data
- S3) <sup>1</sup>H NMR spectroscopy data
- S4) Powder X-ray diffraction data
- S5) References

## S1. Experimental section

### A) Materials

2,6-Dimethyl-4*H*-pyran-4-one (**DMP**) was purchased from Sigma-Aldrich. 4-Oxo-4*H*-pyran-2,6-dicarboxylic acid (**CA**) was purchased from Honeywell Research Chemicals. Solvents were purchased from Fisher Scientific. All reagents and solvents were used without further purification.

### B) Synthesis

#### 1) Preparation of single crystals of **CA·THF**

**CA** powder (55 mg, 0.3 mmol) was dissolved in 5 mL THF. Single crystals as colorless irregular prisms were obtained after slow evaporation of 2 days. **CA·THF** quickly lost THF molecules and generated the non-solvated form of **CA** within periods of minutes. Powder X-ray diffraction (PXRD) showed the resulting powder to be the same phase as the solid obtained commercially (Honeywell Research Chemicals).

#### 2) Preparation of cocrystals of **CA·DMP·2H<sub>2</sub>O**

**CA** (50 mg, 0.27 mmol) and **DMP** (33.7 mg, 0.27mmol; 1:1 molar ratio) were dissolved in 5 mL warm MeOH/H<sub>2</sub>O (1:1). Single crystals of **CA·DMP·2H<sub>2</sub>O** as transparent plates were obtained by slow evaporation over a period of 3 days. The purity of **CA·DMP·2H<sub>2</sub>O** is confirmed by PXRD. Compositions of **CA·DMP·2H<sub>2</sub>O** were determined by <sup>1</sup>H NMR spectroscopy and single crystal X-ray diffraction.

### C) Photodimerization

All photodimerization reactions were carried out in an ACE Glass photochemistry cabinet using a 450 W Hanovia medium-pressure mercury lamp with a broad wavelength distribution. Approximately 40-48% of total energy radiated lies in the UV range of the spectrum, 40-43% in the visible, and the balance in the IR. Cocrystals of **CA·DMP·2H<sub>2</sub>O** were finely ground using a mortar and pestle before being placed between a pair of Pyrex glass plates. Samples were irradiated in 10 h intervals to ensure uniform irradiation. The progress of the photodimerization reaction was monitored using <sup>1</sup>H NMR spectroscopy.

## S2. Single-crystal X-ray diffraction data

Single-crystal X-ray diffraction data of **CA·THF**, **CA·DMP·2H<sub>2</sub>O** and **CG1-H** were collected on a Bruker D8 Venture Duo diffractometer using MoK $\alpha$  radiation ( $\lambda=0.71073$  Å) with APEX II detector. Single-crystal X-ray diffraction data of **CG2** were collected on a Nonius APEX II Kappa diffractometer using MoK $\alpha$  radiation ( $\lambda=0.71073$  Å). Crystals were mounted in paratone oil on a Mitegen magnetic mount. Lorentz and polarization corrections with programs from the APEXII package were used for data reduction. Structure solution and refinement were completed using SHELXT<sup>1</sup> and SHELXL<sup>2</sup>, respectively within the Olex<sup>23</sup> graphical user interface. Non-hydrogen atoms were refined anisotropically. Hydrogen atoms were positioned geometrically and refined using a riding model.

**Table S1.** Crystallographic parameters for **CA·DMP·2H<sub>2</sub>O** and **CG1-H·6H<sub>2</sub>O**.

| Compound name                                                | <b>CA·DMP·2H<sub>2</sub>O</b>                                                | <b>CG1-H·6H<sub>2</sub>O</b>                                                 |
|--------------------------------------------------------------|------------------------------------------------------------------------------|------------------------------------------------------------------------------|
| CCDC deposition number                                       | 2082537                                                                      | 2082538                                                                      |
| Empirical formula                                            | C <sub>14</sub> H <sub>16</sub> O <sub>10</sub>                              | C <sub>14.6</sub> H <sub>24.6</sub> O <sub>19.4</sub> *                      |
| Formula weight                                               | 344.27                                                                       | 510.51                                                                       |
| Temperature/K                                                | 298.15                                                                       | 150.15                                                                       |
| Crystal system                                               | triclinic                                                                    | triclinic                                                                    |
| Space group                                                  | <i>P</i> -1                                                                  | <i>P</i> -1                                                                  |
| <i>a</i> /Å                                                  | 8.2125(17)                                                                   | 7.7763(19)                                                                   |
| <i>b</i> /Å                                                  | 9.891(2)                                                                     | 8.1868(17)                                                                   |
| <i>c</i> /Å                                                  | 11.508(3)                                                                    | 8.683(2)                                                                     |
| $\alpha$ /°                                                  | 64.766(10)                                                                   | 82.568(7)                                                                    |
| $\beta$ /°                                                   | 85.376(8)                                                                    | 82.756(8)                                                                    |
| $\gamma$ /°                                                  | 74.390(10)                                                                   | 65.804(6)                                                                    |
| Volume/Å <sup>3</sup>                                        | 813.7(3)                                                                     | 498.4(2)                                                                     |
| <i>Z</i>                                                     | 2                                                                            | 1                                                                            |
| $\rho_{\text{calc}}$ /cm <sup>3</sup>                        | 1.405                                                                        | 1.701                                                                        |
| $\mu$ /mm <sup>-1</sup>                                      | 0.122                                                                        | 0.163                                                                        |
| <i>F</i> (000)                                               | 360.0                                                                        | 267.0                                                                        |
| Crystal size/mm <sup>3</sup>                                 | 0.125 × 0.12 × 0.07                                                          | 0.105 × 0.095 × 0.02                                                         |
| Radiation                                                    | MoK $\alpha$ ( $\lambda = 0.71073$ )                                         | MoK $\alpha$ ( $\lambda = 0.71073$ )                                         |
| 2 $\theta$ range for data collection/°                       | 4.69 to 52.764                                                               | 4.746 to 50.04                                                               |
| Index ranges                                                 | -10 ≤ <i>h</i> ≤ 10, -12 ≤ <i>k</i> ≤ 12, -14 ≤ <i>l</i> ≤ 14                | -9 ≤ <i>h</i> ≤ 9, -9 ≤ <i>k</i> ≤ 9, 0 ≤ <i>l</i> ≤ 10                      |
| Reflections collected                                        | 20353                                                                        | 1743                                                                         |
| Independent reflections                                      | 3320 [ <i>R</i> <sub>int</sub> = 0.0276, <i>R</i> <sub>sigma</sub> = 0.0214] | 1743 [ <i>R</i> <sub>int</sub> = 0.0279, <i>R</i> <sub>sigma</sub> = 0.0767] |
| Data/restraints/parameters                                   | 3320/0/227                                                                   | 1743/1/186                                                                   |
| Goodness-of-fit on <i>F</i> <sup>2</sup>                     | 1.066                                                                        | 1.068                                                                        |
| Final <i>R</i> indexes [ <i>I</i> ≥ 2 $\sigma$ ( <i>I</i> )] | <i>R</i> <sub>1</sub> = 0.0415, <i>wR</i> <sub>2</sub> = 0.1215              | <i>R</i> <sub>1</sub> = 0.0605, <i>wR</i> <sub>2</sub> = 0.1220              |
| Final <i>R</i> indexes [all data]                            | <i>R</i> <sub>1</sub> = 0.0568, <i>wR</i> <sub>2</sub> = 0.1333              | <i>R</i> <sub>1</sub> = 0.1004, <i>wR</i> <sub>2</sub> = 0.1424              |
| Largest diff. peak/hole / e Å <sup>-3</sup>                  | 0.20/-0.20                                                                   | 0.34/-0.36                                                                   |

\*Non-integral number of atoms in unit cell from substitutional disorder at O2 position: 2/3 C-O-H; 1/3 C-O-CH<sub>3</sub>.

**Table S2.** Crystallographic parameters for **CA·THF** and **CG2**.

| Compound name                               | <b>CA·THF</b>                                                 | <b>CG2</b>                                                   |
|---------------------------------------------|---------------------------------------------------------------|--------------------------------------------------------------|
| CCDC deposition number                      | 2082539                                                       | 2082540                                                      |
| Empirical formula                           | C <sub>11</sub> H <sub>12</sub> O <sub>7</sub>                | C <sub>14</sub> H <sub>16</sub> O <sub>4</sub>               |
| Formula weight                              | 256.21                                                        | 248.27                                                       |
| Temperature/K                               | 150.15                                                        | 298.15                                                       |
| Crystal system                              | monoclinic                                                    | orthorhombic                                                 |
| Space group                                 | <i>P2<sub>1</sub>/c</i>                                       | <i>Cmce</i>                                                  |
| a/Å                                         | 9.6261(10)                                                    | 12.4105(12)                                                  |
| b/Å                                         | 11.4586(11)                                                   | 7.2547(7)                                                    |
| c/Å                                         | 11.0733(11)                                                   | 13.7901(14)                                                  |
| α/°                                         | 90                                                            | 90                                                           |
| β/°                                         | 111.621(5)                                                    | 90                                                           |
| γ/°                                         | 90                                                            | 90                                                           |
| Volume/Å <sup>3</sup>                       | 1135.5(2)                                                     | 1241.6(2)                                                    |
| Z                                           | 4                                                             | 4                                                            |
| ρ <sub>calc</sub> /cm <sup>3</sup>          | 1.499                                                         | 1.328                                                        |
| μ/mm <sup>-1</sup>                          | 0.127                                                         | 0.097                                                        |
| F(000)                                      | 536.0                                                         | 528.0                                                        |
| Crystal size/mm <sup>3</sup>                | 0.14 × 0.085 × 0.055                                          | 0.34 × 0.16 × 0.1                                            |
| Radiation                                   | MoKα (λ = 0.71073)                                            | MoKα (λ = 0.71073)                                           |
| 2θ range for data collection/°              | 4.552 to 52.778                                               | 8.792 to 50.696                                              |
| Index ranges                                | -12 ≤ h ≤ 12, -14 ≤ k ≤ 14, -12 ≤ l ≤ 13                      | -14 ≤ h ≤ 14, -7 ≤ k ≤ 8, -16 ≤ l ≤ 15                       |
| Reflections collected                       | 25641                                                         | 3393                                                         |
| Independent reflections                     | 2319 [R <sub>int</sub> = 0.0281, R <sub>sigma</sub> = 0.0145] | 598 [R <sub>int</sub> = 0.0659, R <sub>sigma</sub> = 0.0315] |
| Data/restraints/parameters                  | 2319/0/165                                                    | 598/0/49                                                     |
| Goodness-of-fit on F <sup>2</sup>           | 1.099                                                         | 1.052                                                        |
| Final R indexes [I >= 2σ (I)]               | R <sub>1</sub> = 0.0319, wR <sub>2</sub> = 0.0818             | R <sub>1</sub> = 0.0439, wR <sub>2</sub> = 0.1102            |
| Final R indexes [all data]                  | R <sub>1</sub> = 0.0362, wR <sub>2</sub> = 0.0847             | R <sub>1</sub> = 0.0527, wR <sub>2</sub> = 0.1167            |
| Largest diff. peak/hole / e Å <sup>-3</sup> | 0.24/-0.21                                                    | 0.19/-0.12                                                   |

### S3. NMR spectral data

$^1\text{H}$  NMR spectra were collected at ambient temperature using a Bruker AVANCE 400 MHz NMR spectrometer.  $\text{DMSO-}d_6$ ,  $\text{CDCl}_3$  and  $\text{D}_2\text{O}$  were used as NMR solvents. All NMR data were processed with MestreNova software suite.

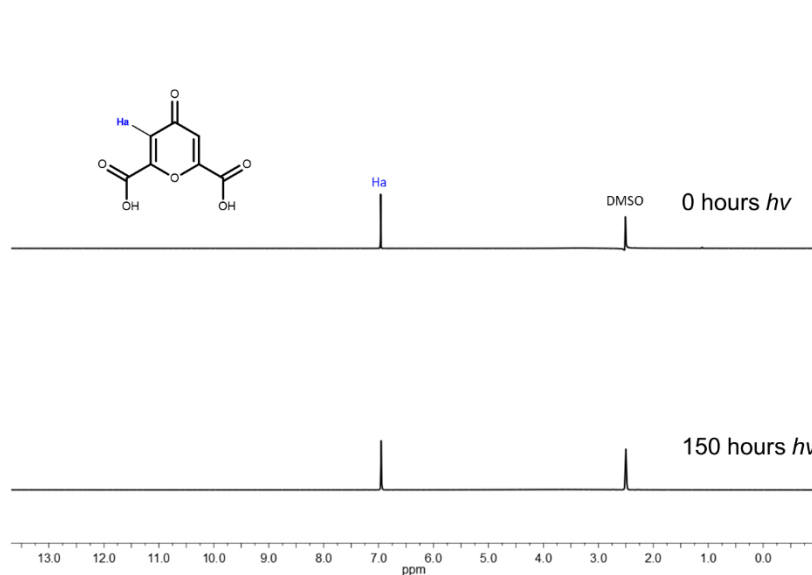

**Fig. S1.**  $^1\text{H}$  NMR spectra showing photostability of **CA** after UV irradiation (150 h) (400 MHz,  $\text{DMSO-}d_6$ ).

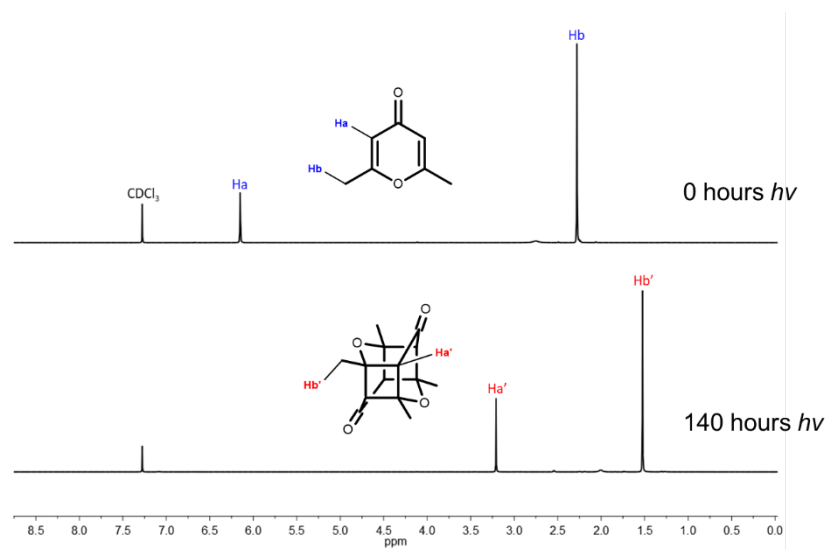

**Fig. S2.** <sup>1</sup>H NMR spectra of **DMP** before (top) and after (bottom) UV irradiation for 140 h (400 MHz, CDCl<sub>3</sub>).

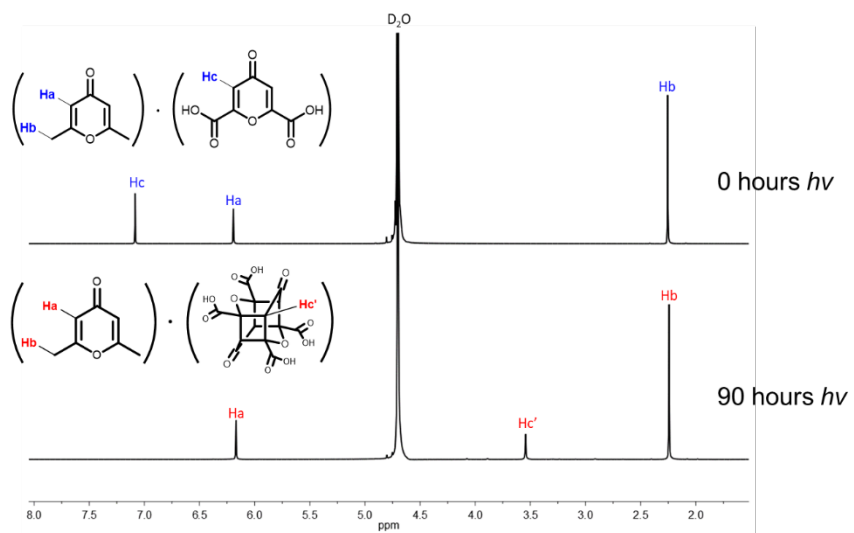

**Fig. S3.** <sup>1</sup>H NMR spectra of **CA·DMP·2H<sub>2</sub>O** before (top) and after (bottom) UV irradiation for 90 h (400 MHz, D<sub>2</sub>O).

#### S4. Powder X-ray diffraction data

Powder X-ray diffraction data were collected using a Bruker D8 Advance X-ray diffractometer with  $\text{CuK}\alpha_1$  radiation ( $\lambda = 1.54056 \text{ \AA}$ ) typically in the range of  $5\text{--}35^\circ$  two-theta (scan type: locked coupled; scan mode: continuous; step size:  $0.02^\circ$ ). Samples were ground and mounted on glass slides. The equipment was operated at 40 kV and 30 mA.

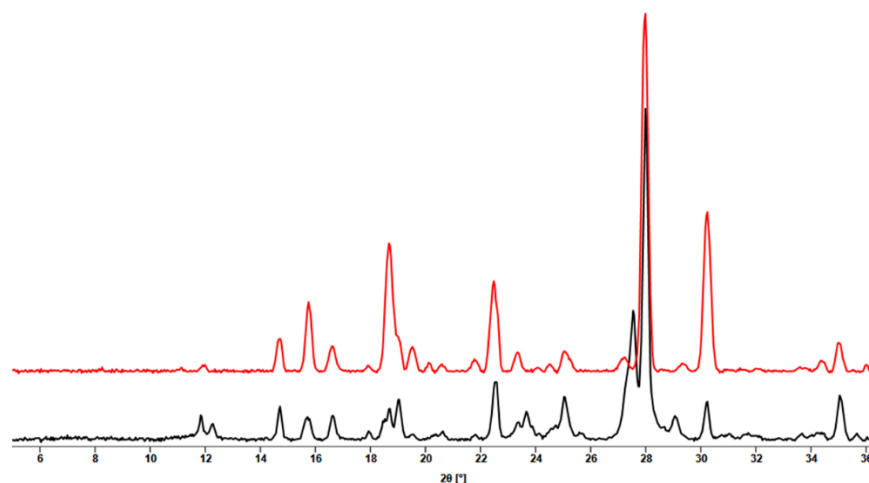

**Fig. S4.** PXRD patterns from commercial sample of **CA** (red) and desolvated **CA·THF** (black).

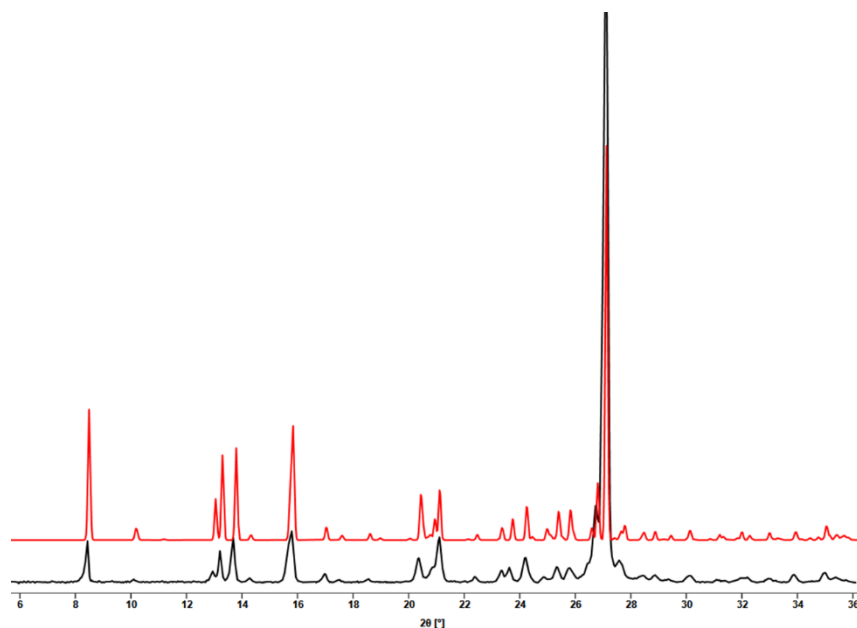

**Fig. S5.** PXRD patterns of **CA·DMP·2H<sub>2</sub>O**: simulated pattern from single crystal X-ray diffraction data (red); experimental pattern from powder sample (black).



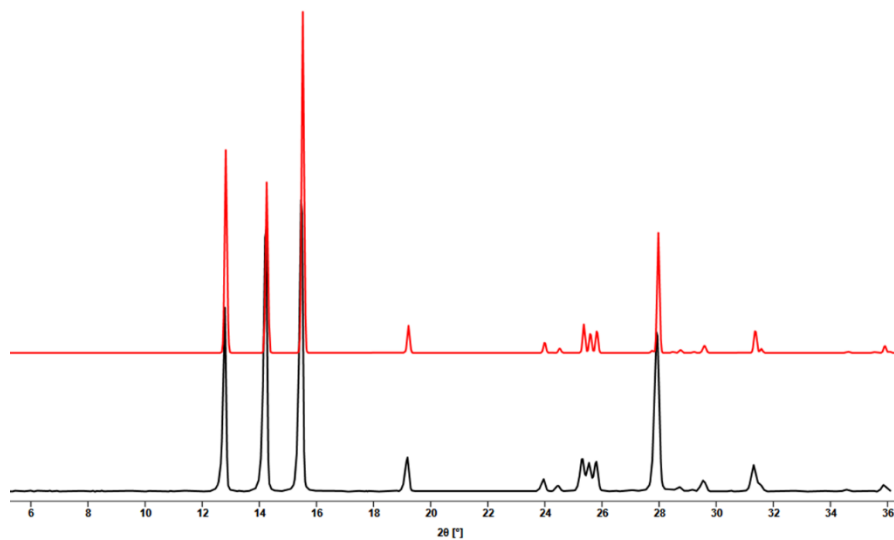

**Fig. S6.** PXRD patterns of **CG2**: simulated pattern from single crystal X-ray diffraction data (red); experimental pattern from powder sample (black).

## S5. References

1. G. M. Sheldrick, *Acta Cryst. A*, 2015, **71**, 3-8.
2. G. M. Sheldrick, *Acta Cryst. C*, 2015, **71**, 3-8.
3. O. V. Dolomanov, L. J. Bourhis, R. J. Gildea, J. A. Howard and H. Puschmann, *J. Appl. Crystallogr.*, 2009, **42**, 339-341.
